# Supplementary material for: Identification and Characterization of Auxin/IAA Biosynthesis Pathway in the Rice Blast Fungus Magnaporthe oryzae
Source: MDPI journal article supplement (doi:10.3390/jof8020208), 2022-02-21
Supplement: s1 [file s1]

**Figure S1**

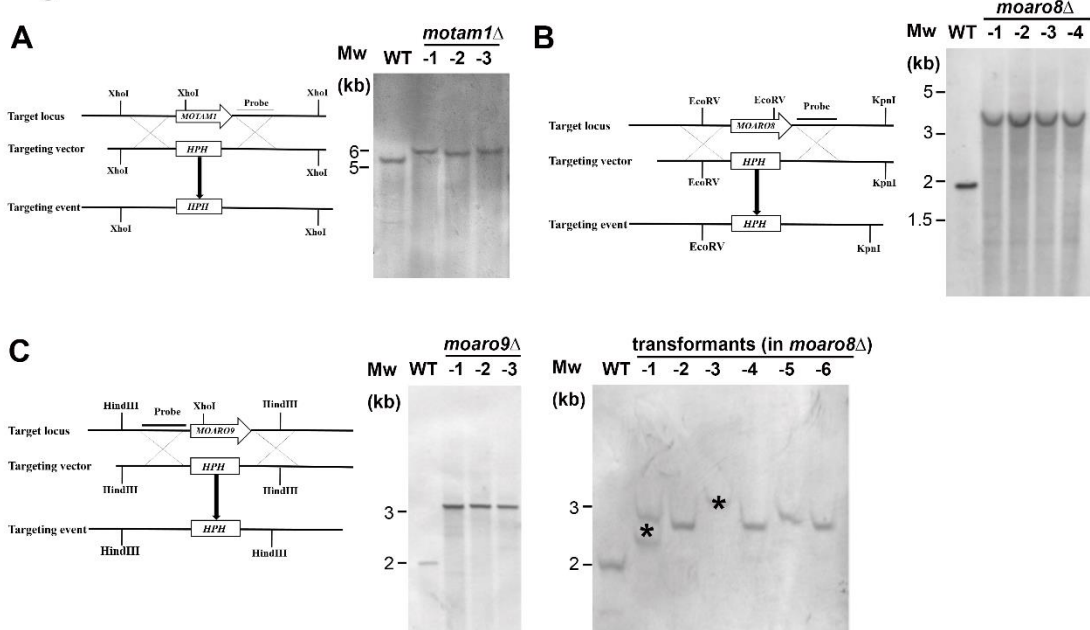

Figure S1. Construction and verification of deletion mutants.

(A-C) Schematic representation of gene deletion strategy and Southern blotting analysis for verification of gene deletion events, for *MoTAM1*, *MoARO8* and *MoARO9*. The targeted gene was replaced by hygromycin phosphotransferase cassette (*HPH*; for individual gene deletion), or by glufosinate ammonium resistance cassette (for deleting *MoARO9* in the *moaro8Δ* mutant background). The sites of the restriction enzyme used for digesting genomic DNA, and the probes for detecting the gene locus replacement, were labeled in the schemes, which were not drawn to scale. For the *motam1Δ* mutants, the WT band of 5.5-kb was lost and concomitantly a single band of 6.6-kb was detected in the *motam1Δ* mutants. For *MoARO8* gene, a single band of 1.6-kb was detected by probe in the WT strain, while it disappeared in the *moaro8Δ* mutants. Instead, a single band of 3.3-kb was detected by the same probe. For single deletion of *MoARO9* gene, the WT band of 2.0-kb disappeared and a single band of 3.1-kb was detected, diagnostic of the *moaro9Δ* mutants. The same probe detected a single band of 2.8-kb as diagnostic of *MoARO9* gene deletion in the *moaro8Δ* background. Asterisks denote transformants with random insertion but not targeted gene replacement.

**Figure S2**

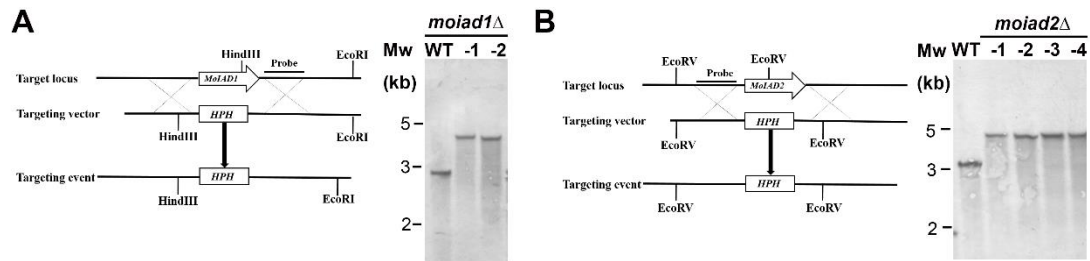

Figure S2. Construction and verification of *MoIAD1* and *MoIAD2* deletion mutants.

(A-B) Schematic representation of gene deletion strategy and Southern blotting analysis for verification of gene deletion events for *MoIAD1* and *MoIAD2*. The targeted gene was replaced by hygromycin phosphotransferase cassette (*HPH*). The sites of the restriction enzyme used for digesting genomic DNA of WT and deletion mutants were labeled. The schemes were not drawn to scale. For *MoIAD1* gene, probe detected a single band of 2.8-kb in WT strain and a single band of 4.5-kb in the *moiad1Δ* mutants. For the *moiad2Δ* mutants, a single band of 3.0-kb was detected by probe in WT, while disappeared in the *moiad2Δ* mutants. Instead, a single band of 4.3-kb was detected by the same probe.

**Table S1.** Primers used in this study

| Gene(Locus)                  | Description                                           | Enzyme sites   | Primer sequence                                            |
|------------------------------|-------------------------------------------------------|----------------|------------------------------------------------------------|
| <i>MoTAM1</i><br>(MGG_14221) | Deletion construct                                    | <i>XhoI</i>    | UPF: 5'-GCCCTCGAGCTTGTCTAGTATAGTAGCCTTG-3'                 |
|                              |                                                       | <i>BamHI</i>   | UPR: 5'-GCCGGATCCTCCCGGTTTACTTCCCAGTG-3'                   |
|                              |                                                       | <i>PstI</i>    | DSF: 5'-GCCCTGCAGTGTAGATTGTATATGCAAAAG-3'                  |
|                              |                                                       | <i>HindIII</i> | DSR: 5'-GCCAAGCTTCTAGACAGCATACTCTTCCAG-3'                  |
| <i>MoARO8</i><br>(MGG_09919) | Deletion construct                                    | <i>EcoRI</i>   | UPF: 5'-CCGGAATTCCGCATAGTGTTGGTCTCAGA-3'                   |
|                              |                                                       | <i>BamHI</i>   | UPR: 5'-CGCGGATCCGATGAGTTGTGCGAACAGAG-3'                   |
|                              |                                                       | <i>PstI</i>    | DSF: 5'-AACTGCAGGGTGGTCTTTCTCGGTTGT-3'                     |
|                              |                                                       | <i>HindIII</i> | DSR: 5'-CCCAAGCTT GCGATGGTGTTATTGTTGC-3'                   |
| <i>MoARO9</i><br>(MGG_08189) | Deletion construct<br>(in wild-type background)       | <i>BamHI</i>   | UPF: 5'-CGCGGATCCGAGATACCACCAGTTCCGTC-3'                   |
|                              |                                                       | <i>XbaI</i>    | UPR: 5'-TGCTCTAGAGCTGGTGACGATTACAAATG-3'                   |
|                              |                                                       | <i>PstI</i>    | DSF: 5'-AACTGCAGGTGAATAAGCGGCGTTTG-3'                      |
|                              |                                                       | <i>PvuII</i>   | DSR: 5'-CCAGCTGGCCAGAAGTGAGTAGCGACT-3'                     |
| <i>MoARO9</i><br>(MGG_08189) | Deletion construct<br>( in <i>moaro8Δ</i> background) | <i>KpnI</i>    | UPF: 5'-GGGGTACCGAGATACCACCAGTTCCGTC-3'                    |
|                              |                                                       | <i>XbaI</i>    | UPR: 5'-TGCTCTAGAGCTGGTGACGATTACAAATG-3'                   |
|                              |                                                       | <i>SalI</i>    | DSF: 5'-GCGTCGACGTGAATAAGCGGCGTTTG-3'                      |
|                              |                                                       | <i>PstI</i>    | DSR: 5'-AACTGCAGGCCAGAAGTGAGTAGCGACT-3'                    |
| <i>MoIAD1</i><br>(MGG_03900) | Deletion construct                                    | <i>EcoRI</i>   | UPF: 5'-TATGGAGAAACTCGAGAATTCGCAAACAC<br>ACAAATCGGGTCA-3'  |
|                              |                                                       | <i>BamHI</i>   | UPR: 5'-GACTCTAGAACTAGTGGATCCAGGTGGAAGG<br>TCGTGAGTTTGG-3' |
|                              |                                                       | <i>SalI</i>    | DSF: 5'-ACGCGTCGACGGAGCCAGCAAAGAAATG-3'                    |
|                              |                                                       | <i>HindIII</i> | DSR: 5'-CCCAAGCTTCAATCACAACCAAACTCAGC-3'                   |

**Table S1. Cont.**

| Gene(Locus)                           | Description        | Enzyme sites   | Primer sequence                          |
|---------------------------------------|--------------------|----------------|------------------------------------------|
| <i>MoIAD2</i><br>( <i>MGG_05008</i> ) | Deletion construct | <i>EcoRI</i>   | UPF: 5'-CCGGAATTCGAGACGGTAGCGAATGAGAG-3' |
|                                       |                    | <i>XbaI</i>    | UPR: 5'-GCTCTAGAGTTACGGTAGTATGACGAGGG-3' |
|                                       |                    | <i>HindIII</i> | DSF: 5'-CCCAAGCTTGCTTGCTTTGGTTGACAGA-3'  |
|                                       |                    | <i>PvuII</i>   | DSR: 5'-CCAGCTGGCTCAGACCCGAATAATCTC-3'   |
